# Supplementary material
Source: MDPI journal article supplement (https://www.mdpi.com/2073-445X/9/6/188)
Supplement: s1 [file s1]

## Supplementary material 1

In the form of supplementary material, we show responses of civil and environmental engineering students regarding their relationship to the place of residence (questionnaire question with possibility of multiple choice). Most of the answers cannot be considered as describing the landscape issues directly, hence we decided not to include this part of the analysis to the main paper focused on landscape education.

Analyzing the figure S1 and table S1 content we can observe a big importance of natural or quasi-natural areas for the respondents (70.4 and 59.5% of answers). The following, important aspects of quality of life have been communication, transportation, comfort of place of residence and services (43.4-46.7%). About one third of respondents has noted proximity to the city center as an important aspect of their life. In the “other” index, students have marked such life quality elements as: quiet, calmness, sentiment, the cost of housing, low traffic, recreational facilities, cleanliness, social integration, and proximity to water facilities. Adepts of environmental engineering are relative closer mentally to the green areas while civil engineers clearly higher value the quality of housing.

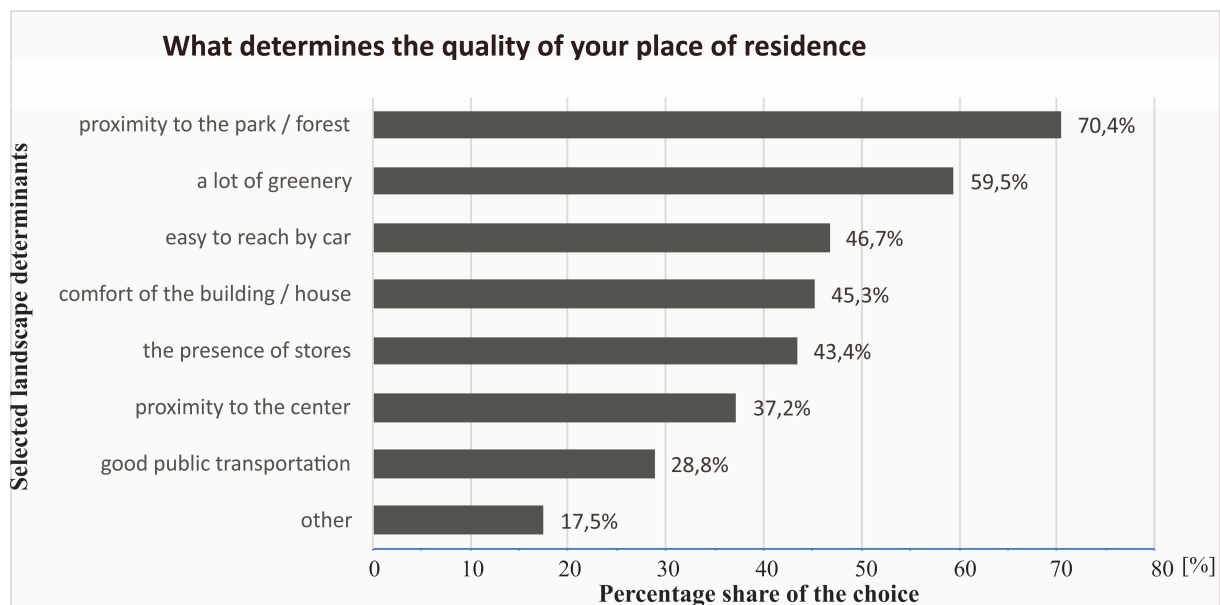

**Figure S1.** Characteristics determining the perception of the place of residence (EnvEng and CivEng students combined, n = 244).

**Table S1.** Share of responses of students regarding their relationship to the place of residence, in %  
(EnvEng and CivEng students combined, n=244)

|                              | proximity<br>to the<br>park/forest | a lot of<br>greenery | easy to<br>reach by<br>car | comfort<br>of the<br>building/<br>house | the<br>presence<br>of stores | proximity<br>to the<br>center | good<br>public<br>transport<br>ation | other |
|------------------------------|------------------------------------|----------------------|----------------------------|-----------------------------------------|------------------------------|-------------------------------|--------------------------------------|-------|
| Environmental<br>engineering | 70.9                               | 70.0                 | 45.9                       | 45.9                                    | 44.7                         | 37.7                          | 29.9                                 | 15.6  |
| Civil<br>engineering         | 66.7                               | 58.2                 | 53.3                       | 40.0                                    | 33.3                         | 33.3                          | 20.0                                 | 33.3  |
| Average                      | 70.4                               | 59.5                 | 46.7                       | 45.3                                    | 43.4                         | 37.2                          | 28.8                                 | 17.5  |

The data have been given in percent of total population of the test group.
